# Supplementary material for: Seasonal hydrogeochemical response mechanism and comprehensive water quality assessment of groundwater in coastal industrial parks from the perspective of spatiotemporal interweaving
Source: Research Square preprint supplement (doi:10.21203/rs.3.rs-6986952/v1), 2025-09-10
Supplement: Supplementary file 1 [file 4eb6f6166dc7dbb7daf03383.docx]

**Seasonal hydrogeochemical response mechanism and comprehensive water quality assessment of groundwater in coastal industrial parks from the perspective of spatiotemporal interweaving**

Siwei Lia, Ruoliang Yanga, Yanshu Lua, Boyang Sunb, Peng Zhangc,*, Chuqiao Wangd, Zhifei Maa, *

a Key Laboratory of Poyang Lake Environment and Resource Utilization, Ministry of Education, School of Resources & Environment, Nanchang University, Nanchang 330031, China

b Development Research Center of the Ministry of Water Resources of P.R.China

c China National Environmental Monitoring Centre, Beijing, 100012, China

d School of Civil Engineering and Architecture, East China JiaoTong University, Nanchang 330013, China

*Corresponding author: Zhifei Ma, Peng Zhang

Email: [groundwater308b@126.com](mailto:groundwater308b@126.com), [zhangpeng@cnemc.cn](mailto:zhangpeng@cnemc.cn)

**Table S1** Groundwater Quality Classification Levels and Uses

| Range of indicators | Rank | Water quality | Use |
| --- | --- | --- | --- |
| EWQI<25 | I | Excellent | Drinkable |
| 25≤EWQI<50 | II | Good |
| 50≤EWQI<100 | III | Medium | Home use |
| 100≤EWQI<150 | IV | Poor | Completely unsuitable for Drinking |
| EWQI≥150 | V | Very Poor |

Table S2 Correlation Table of Groundwater Chemical Indicators in Cluster Ⅱ

| Sample | pH | F- | Cl- | SO42- | NO3- | NO2- | NH4+ | I- | Zn | Pb | Fe | Mn | Al3+ | Na+ | Cu2+ | TPH |
| --- | --- | --- | --- | --- | --- | --- | --- | --- | --- | --- | --- | --- | --- | --- | --- | --- |
| pH | 1 | -0.592** | 0.274 | 0.213 | 0.076 | 0.038 | 0.128 | -0.05 | -0.903** | -0.712** | -0.026 | -0.085 | -0.930** | 0.34 | -0.362 | 0.146 |
| F- |  | 1 | -0.101 | -0.087 | -0.103 | -0.034 | 0.490* | -0.043 | 0.512* | 0.572* | 0.578** | 0.139 | 0.586** | -0.141 | 0.006 | 0.462* |
| Cl- |  |  | 1 | 0.991** | 0.408 | -0.08 | 0.229 | -0.193 | -0.201 | -0.119 | 0.403 | -0.262 | -0.19 | 0.787** | -0.046 | 0.263 |
| SO42- |  |  |  | 1 | 0.4 | -0.125 | 0.199 | -0.188 | -0.137 | -0.056 | 0.373 | -0.285 | -0.122 | 0.782** | -0.038 | 0.212 |
| NO3- |  |  |  |  | 1 | 0.414 | -0.166 | -0.061 | -0.195 | -0.217 | -0.13 | -0.135 | -0.131 | -0.142 | -0.389 | 0.01 |
| NO2- |  |  |  |  |  | 1 | -0.047 | -0.133 | -0.173 | -0.233 | -0.002 | 0.096 | -0.157 | -0.205 | -0.092 | 0.055 |
| NH4+ |  |  |  |  |  |  | 1 | -0.225 | -0.123 | -0.081 | 0.681** | 0.312 | -0.093 | 0.275 | -0.317 | 0.655** |
| I- |  |  |  |  |  |  |  | 1 | -0.092 | -0.07 | -0.017 | -0.09 | -0.057 | -0.19 | -0.208 | -0.128 |
| Zn |  |  |  |  |  |  |  |  | 1 | 0.819** | 0.026 | -0.026 | 0.964** | -0.166 | 0.597** | -0.095 |
| Pb |  |  |  |  |  |  |  |  |  | 1 | -0.037 | -0.12 | 0.866** | -0.069 | 0.534* | -0.201 |
| Fe |  |  |  |  |  |  |  |  |  |  | 1 | -0.063 | 0.046 | 0.521* | -0.164 | 0.873** |
| Mn |  |  |  |  |  |  |  |  |  |  |  | 1 | -0.046 | -0.263 | -0.103 | -0.045 |
| Al3+ |  |  |  |  |  |  |  |  |  |  |  |  | 1 | -0.187 | 0.442 | -0.105 |
| Na+ |  |  |  |  |  |  |  |  |  |  |  |  |  | 1 | 0.153 | 0.342 |
| Cu2+ |  |  |  |  |  |  |  |  |  |  |  |  |  |  | 1 | -0.263 |
| TPH |  |  |  |  |  |  |  |  |  |  |  |  |  |  |  | 1 |

Note：** means P<0.01, * means P<0.05.

Table S3 Correlation Table of Groundwater Chemical Indicators in Cluster Ⅲ

| Sample | pH | F- | Cl- | SO42- | NO3- | NO2- | NH4+ | I- | Zn | Pb | Fe | Mn | Al3+ | Na+ | Cu2+ | TPH |
| --- | --- | --- | --- | --- | --- | --- | --- | --- | --- | --- | --- | --- | --- | --- | --- | --- |
| pH | 1 | 0.792** | -0.762* | -0.063 | 0.091 | 0.376 | -0.385 | -0.169 | -0.852** | -0.891** | -0.864** | -0.742* | -0.521 | -0.697* | -0.579 | -0.537 |
| F- |  | 1 | -0.481 | 0.372 | 0.156 | 0.5 | -0.655* | -0.121 | -0.43 | -0.509 | -0.548 | -0.47 | -0.554 | -0.421 | -0.174 | -0.488 |
| Cl- |  |  | 1 | 0.38 | -0.137 | -0.386 | 0.376 | 0.002 | 0.802** | 0.821** | 0.963** | 0.997** | 0.154 | 0.994** | 0.525 | 0.149 |
| SO42- |  |  |  | 1 | 0.603 | 0.553 | -0.314 | -0.216 | 0.296 | 0.287 | 0.301 | 0.373 | -0.204 | 0.419 | 0.191 | -0.193 |
| NO3- |  |  |  |  | 1 | 0.867** | -0.154 | -0.322 | -0.19 | -0.117 | -0.183 | -0.165 | -0.015 | -0.121 | -0.195 | -0.105 |
| NO2- |  |  |  |  |  | 1 | -0.275 | -0.294 | -0.359 | -0.315 | -0.425 | -0.418 | -0.157 | -0.36 | -0.222 | -0.204 |
| NH4+ |  |  |  |  |  |  | 1 | -0.275 | 0.139 | 0.176 | 0.32 | 0.365 | 0.088 | 0.377 | 0.09 | -0.127 |
| I- |  |  |  |  |  |  |  | 1 | 0.141 | 0.159 | 0.112 | 0.007 | -0.153 | -0.047 | -0.215 | 0.194 |
| Zn |  |  |  |  |  |  |  |  | 1 | 0.980** | 0.918** | 0.782** | 0.226 | 0.752* | 0.639* | 0.311 |
| Pb |  |  |  |  |  |  |  |  |  | 1 | 0.940** | 0.793** | 0.305 | 0.764* | 0.552 | 0.402 |
| Fe |  |  |  |  |  |  |  |  |  |  | 1 | 0.949** | 0.231 | 0.931** | 0.538 | 0.282 |
| Mn |  |  |  |  |  |  |  |  |  |  |  | 1 | 0.141 | 0.996** | 0.531 | 0.131 |
| Al3+ |  |  |  |  |  |  |  |  |  |  |  |  | 1 | 0.097 | 0.387 | 0.919** |
| Na+ |  |  |  |  |  |  |  |  |  |  |  |  |  | 1 | 0.512 | 0.073 |
| Cu2+ |  |  |  |  |  |  |  |  |  |  |  |  |  |  | 1 | 0.279 |
| TPH |  |  |  |  |  |  |  |  |  |  |  |  |  |  |  | 1 |

Note：** means P<0.01, * means P<0.05.
